# Supplementary material for: An ANOVA approach for statistical comparisons of brain networks
Source: PubMed Central journal article supplement (PMC5856783; doi:10.1038/s41598-018-23152-5), 2018-03-16
Supplement: 41598_2018_23152_MOESM1_ESM.pdf [file 41598_2018_23152_MOESM1_ESM.pdf]

# SUPPLEMENTARY INFORMATION OF “AN ANOVA APPROACH FOR STATISTICAL COMPARISONS OF BRAIN NETWORKS”

DANIEL FRAIMAN<sup>1,2</sup> & RICARDO FRAIMAN<sup>3</sup>

## CONTENTS

|     |                                                |    |
|-----|------------------------------------------------|----|
| 1   | A1- Proof of Theorem 1                         | 3  |
| 1.1 | Notation                                       | 3  |
| 1.2 | A1.1- Proof i : $\mathbb{E}(T) = 0$ .          | 3  |
| 1.3 | A1.2- Proof ii : $T \rightarrow N(0, 1)$ .     | 4  |
| 1.4 | A1.4- Proof iii: Under $H_A$                   | 7  |
| 2   | A2- Example 1                                  | 9  |
| 3   | A3- HCP Resting-state fMRI functional networks | 11 |

## LIST OF FIGURES

|          |                                                                                                                                                                                                                                                                                       |    |
|----------|---------------------------------------------------------------------------------------------------------------------------------------------------------------------------------------------------------------------------------------------------------------------------------------|----|
| Figure 1 | Fig A1: Power of the tests as a function of the sample size for the model with parameters $\lambda_1 = 0.5$ , $\lambda_2 = 2/3$ , and $\lambda_3 = 0.5$ .                                                                                                                             | 9  |
| Figure 2 | Fig A2: <b>Null hypothesis.</b> Variance of T statistics as a function of the sample size, K for the model with parameters $\lambda_1 = 0.5$ , $\lambda_2 = 0.8$ , and $\lambda_3 = 0.6$ .                                                                                            | 9  |
| Figure 3 | Fig A3: Histogram of number of nodes determine by identification procedure. These results correspond to the model with parameters $\lambda_1 = 0.5$ , $\lambda_2 = 0.8$ , $\lambda_3 = 0.6$ and $K = 30$ .                                                                            | 10 |
| Figure 4 | Fig A4: Relationship between variable Right Inferiortemporal Area and variable: (A) Amount of sleep , (B) Brain segmentation volume. The Spearman correlation coefficient between both variables are shown. (C) Spearman correlation matrix between the highly significant variables. | 12 |
| Figure 5 | Fig A5: T–statistics as a function of (left panel) $\rho$ and (right panel) the number of links for the variable <i>Picture vocabulary test</i> .                                                                                                                                     | 12 |

## LIST OF TABLES

|         |                                                                                                                                                                                           |    |
|---------|-------------------------------------------------------------------------------------------------------------------------------------------------------------------------------------------|----|
| Table 1 | Variables that partitioned the subjects in groups that present very high statistical differences between the corresponding brain networks. Only variables with $W_3 \geq 4$ are included. | 11 |
|---------|-------------------------------------------------------------------------------------------------------------------------------------------------------------------------------------------|----|

|         |                                                                                                                                                                                                                                                                                                            |    |
|---------|------------------------------------------------------------------------------------------------------------------------------------------------------------------------------------------------------------------------------------------------------------------------------------------------------------|----|
| Table 2 | Behavioral variables that partitioned the subjects in groups that present high statistical differences between the corresponding brain networks. The $W_3$ , $W_4$ and $W_5$ statistics are presented for different networks sizes (15 / 50 / 300). Only variables with $W_3 \geq 4$ are included. . . . . | 11 |
|---------|------------------------------------------------------------------------------------------------------------------------------------------------------------------------------------------------------------------------------------------------------------------------------------------------------------|----|

---

<sup>1</sup> *Departamento de Matemática y Ciencias, Universidad de San Andrés, Buenos Aires, Argentina.*

<sup>2</sup> *Consejo Nacional de Investigaciones Científicas y Tecnológicas (CONICET), Buenos Aires, Argentina.*

<sup>3</sup> *Centro de Matemática, Facultad de Ciencias, Universidad de la República, Montevideo, Uruguay.*

## 1 A1- PROOF OF THEOREM 1

$$T := \frac{\sqrt{m}}{a} \sum_{i=1}^m \sqrt{n_i} \left( \frac{n_i}{n_i-1} \bar{d}_{G^i}(\mathcal{M}_i) - \frac{n}{n-1} \bar{d}_G(\mathcal{M}_i) \right) \quad (1)$$

**Theorem 1.** *Under the null hypothesis the statistic  $T$  verifies i) and ii), while  $T$  is sensitive to the alternative hypothesis, verifying iii).*

i)  $\mathbb{E}(T) = 0$ .

ii)  $T$  is asymptotically ( $K := \min\{n_1, n_2, \dots, n_m\} \rightarrow \infty$ )  $Normal(0,1)$ .

iii) Under the alternative hypothesis  $T$  will be smaller than any negative value for  $K$  large enough (The test is consistent).

## 1.1 Notation

Let  $T = \frac{\sqrt{m}}{a} Z$  with

- $Z = \sum_{i=1}^m W_i$
- $W_i = b_i D_{G^i}(\mathcal{M}_i) - c_i D_G(\mathcal{M}_i)$
- $b_i = \frac{\sqrt{n_i}}{n_i-1}$
- $c_i = \frac{\sqrt{n_i}}{n-1}$
- $D_{G^i}(\mathcal{M}_i) = n_i \bar{d}_{G^i}(\mathcal{M}_i)$
- $D_G(\mathcal{M}_i) = n \bar{d}_G(\mathcal{M}_i)$ .

1.2 A1.1- Proof i :  $\mathbb{E}(T) = 0$ .

Let denote by  $G_1^1, \dots, G_{n_1}^1$  the sample networks from subpopulation 1,  $G_1^2, \dots, G_{n_2}^2$  the ones from subpopulation 2, and so on until  $G_1^m, \dots, G_{n_m}^m$  the networks from subpopulation  $m$ . Let denote without superscript  $G_1, \dots, G_n$  the complete pooled sample of networks where  $n = \sum_{i=1}^m n_i$ . And let  $G_1^{k\oplus}, \dots, G_{n_{k\oplus}}^{k\oplus}$  be the pooled sample of networks without the sample  $k$  where  $n_{k\oplus} = \sum_{h \neq k} n_h$ .

The sum of the distance from the pooled sample to the average network of sample  $k$  ( $\mathcal{M}_k$ ) can be decomposed in the following way,

$$D_G(\mathcal{M}_k) = D_{G^k}(\mathcal{M}_k) + D_{G^{k\oplus}}(\mathcal{M}_k).$$

Where

$$D_{G^k}(\mathcal{M}_k) = n_k \sum_{i < j} 2\hat{p}_k(i, j)(1 - \hat{p}_k(i, j)),$$

$$D_{G^{k\oplus}}(\mathcal{M}_k) = n_{k\oplus} \left( \sum_{i < j} \hat{p}_{k\oplus}(i, j)(1 - \hat{p}_k(i, j)) + \hat{p}_k(i, j)(1 - \hat{p}_{k\oplus}(i, j)) \right),$$

and  $\hat{p}_k(i, j) = \frac{X_{ij}^k}{n_k}$  is the proportion of times the link  $(i, j)$  appears in the sample  $k$  ( $X_{ij}^k$  is the number of times link  $(i, j)$  appears in sample  $k$ ), and  $\hat{p}_{k\oplus}(i, j)$  the proportion of times link  $(i, j)$  appears in the sample of networks  $G^{k\oplus}$ .

Using the fact that under  $H_0$  it verifies that  $\mathbb{E}(\hat{p}_k(i, j)) = \mathbb{E}(\hat{p}_{k\oplus}(i, j)) =: p(i, j)$ , and applying the equality  $\mathbb{E}(\hat{p}(i, j)^2) = p(i, j)(1 - p(i, j))/n + p(i, j)^2$  it is easy to obtain that

$$\mathbb{E}(D_{G^k}(\mathcal{M}_k)) = (2n_k - 2) \sum_{i < j} p(i, j)(1 - p(i, j)). \quad (2)$$

Now, since  $\hat{p}_k(i, j)$  and  $\hat{p}_{k\oplus}(i, j)$  are independent we obtain,

$$\mathbb{E}(D_{G^{k\oplus}}(\mathcal{M}_k)) = 2n_{k\oplus} \sum_{i < j} p(i, j)(1 - p(i, j)).$$

Therefore,

$$\mathbb{E}(D_G(\mathcal{M}_k)) = (2n - 2) \sum_{i < j} p(i, j)(1 - p(i, j)), \quad (3)$$

and consequently

$$\mathbb{E}\left(\frac{1}{n_k - 1} D_{G^k}(\mathcal{M}_k)\right) = \mathbb{E}\left(\frac{1}{n - 1} D_G(\mathcal{M}_k)\right)$$

which is the same to  $\mathbb{E}(W_k) = 0$ , proving that  $\mathbb{E}(T) = 0$

### 1.3 A1.2- Proof ii : $T \rightarrow N(0, 1)$ .

$\bar{d}_G(\mathcal{M}_k)$  and  $\bar{d}_{G^k}(\mathcal{M}_k)$  verifies the central limit because they are averages of finite variance variables. Under the Null hypothesis, both random variables have expected value zero. Then  $W_k$  has an asymptotic Normal distribution centered in zero. Moreover,  $c \sum_{k=1}^m W_k$ , where  $c$  is a non-zero constant, has an asymptotic Normal distribution centered in zero which finish the proof.

Up till now, we have shown that  $T$  is asymptotically Normal centered in zero. On the following we show that the asymptotic variance is 1.

### A1.3- The value $a$

In this proof we will use only basic properties of the variance and the moments of the Binomial distribution. The value  $a$  is a sum of many simple functions. Here we calculate each of the terms of the sum.

$$\text{Var}(T) = \frac{m}{a^2} \text{Var}(Z)$$

Since we want  $\text{Var}(T) = 1$ ,  $a = \sqrt{m \text{Var}(Z)}$

$$\text{Var}(Z) = \sum_{1 \leq k \leq m} \text{Var}(W_k) + 2 \sum_{1 \leq r < t \leq m} \text{Cov}(W_r, W_t)$$

$$\text{Var}(W_k) = b_k^2 \text{Var}(D_{G^k}(\mathcal{M}_k)) + c_k^2 \text{Var}(D_G(\mathcal{M}_k)) - 2b_k c_k \text{Cov}(D_{G^k}(\mathcal{M}_k), D_G(\mathcal{M}_k))$$

$$\begin{aligned} \text{Cov}(W_r, W_t) = & \text{Cov}(b_r D_{G^r}(\mathcal{M}_r), b_t D_{G^t}(\mathcal{M}_t)) - \text{Cov}(b_r D_{G^r}(\mathcal{M}_r), c_t D_G(\mathcal{M}_t)) \\ & + \text{Cov}(c_r D_G(\mathcal{M}_r), c_t D_G(\mathcal{M}_t)) - \text{Cov}(c_r D_G(\mathcal{M}_r), b_t D_{G^t}(\mathcal{M}_t)) \end{aligned}$$

As we have shown

$$D_{G^k}(\mathcal{M}_k) = n_k \sum_{i < j} 2\hat{p}_k(i, j)(1 - \hat{p}_k(i, j)) = \frac{2}{n_k} \sum_{i < j} X_{i,j}^k (n_k - X_{i,j}^k),$$

and under  $H_0$  is verified that  $X_{1,1}^k, X_{1,2}^k, \dots, X_{1,s}^k, X_{2,1}^k, X_{2,2}^k, \dots, X_{s-1,s}^k$  are i.i.d. random variables with  $X_{i,j}^k \sim \text{Bin}(n_k, p_{i,j})$  where  $s$  is the number of nodes in the network. And

$$\begin{aligned} D_G(\mathcal{M}_k) &= D_{G^k}(\mathcal{M}_k) + D_{G^{k\oplus}}(\mathcal{M}_k) = \\ &= \frac{2}{n_k} \sum_{i < j} X_{i,j}^k (n_k - X_{i,j}^k) + \frac{1}{n_k} \sum_{i < j} (n_{k\oplus} X_{i,j}^k + n_k X_{i,j}^{k\oplus} - 2X_{i,j}^{k\oplus} X_{i,j}^k) \end{aligned}$$

with  $X_{1,1}^{k\oplus}, \dots, X_{s-1,s}^{k\oplus}$  are iid r.v. with  $X_{i,j}^{k\oplus} \sim \text{Bin}(n_{k\oplus}, p_{i,j})$  and are independent of  $X_{i,j}^k$  for all  $i, j$ .

Now we calculate each of the above terms.

$\text{Var}(D_{G^k}(\mathcal{M}_k))$

$$\text{Var}(D_{G^k}(\mathcal{M}_k)) = \left(\frac{2}{n_k}\right)^2 \sum_{i < j} \text{Var}(X_{i,j}^k (n_k - X_{i,j}^k)).$$

$$\text{Var}(X_{i,j}^k (n_k - X_{i,j}^k)) = M_2(X_{i,j}^k) n_k^2 - 2n_k M_3(X_{i,j}^k) + M_4(X_{i,j}^k) - (M_1(X_{i,j}^k) n_k - M_2(X_{i,j}^k))^2,$$

where  $M_i$  is the  $i$ -th moment of the Binomial Distribution.

$$\text{Var}(D_{G^k}(\mathcal{M}_k)) = \left(\frac{2}{n_k}\right)^2 \sum_{i < j} M_2(X_{i,j}^k) n_k^2 - 2n_k M_3(X_{i,j}^k) + M_4(X_{i,j}^k) - (M_1(X_{i,j}^k) n_k - M_2(X_{i,j}^k))^2.$$

$\text{Var}(D_G(\mathcal{M}_k))$

$$\text{Var}(D_G(\mathcal{M}_k)) = \text{Var}(D_{G^k}(\mathcal{M}_k) + D_{G^{k\oplus}}(\mathcal{M}_k))$$

$$\text{Var}(D_G(\mathcal{M}_k)) = \text{Var}(D_{G^k}(\mathcal{M}_k)) + \text{Var}(D_{G^{k\oplus}}(\mathcal{M}_k)) + 2\text{Cov}(D_{G^k}(\mathcal{M}_k), D_{G^{k\oplus}}(\mathcal{M}_k)) \quad (4)$$

The second term on the right,

$$\begin{aligned} \text{Var}(D_{G^{k\oplus}}(\mathcal{M}_k)) &= \text{Var}\left(\frac{1}{n_k} \sum_{i < j} (n_{k\oplus} X_{i,j}^k + n_k X_{i,j}^{k\oplus} - 2X_{i,j}^{k\oplus} X_{i,j}^k)\right) = \\ &= \frac{1}{n_k^2} \sum_{i < j} \text{Var}(n_{k\oplus} X_{i,j}^k + n_k X_{i,j}^{k\oplus} - 2X_{i,j}^{k\oplus} X_{i,j}^k) \\ &= \frac{1}{n_k^2} \sum_{i < j} n_{k\oplus}^2 \text{Var}(X_{i,j}^k) + n_k^2 \text{Var}(X_{i,j}^{k\oplus}) + 4\text{Var}(X_{i,j}^{k\oplus} X_{i,j}^k) - 4n_{k\oplus} \text{Cov}(X_{i,j}^k, X_{i,j}^{k\oplus} X_{i,j}^k) + \\ &\quad - 4n_k \text{Cov}(X_{i,j}^{k\oplus}, X_{i,j}^{k\oplus} X_{i,j}^k). \end{aligned}$$

Each term can be expressed in a simply way in term of the moments of the binomial distribution. For example,

$$\text{Cov}(X_{i,j}^k, X_{i,j}^{k\oplus} X_{i,j}^k) = M_1(X_{i,j}^{k\oplus})(M_2(X_{i,j}^k) - M_1(X_{i,j}^k)^2)$$

The third term on the right on eq. 4,

$$\text{Cov}(D_{G^k}(\mathcal{M}_k), D_{G^{k\oplus}}(\mathcal{M}_k)) = \text{Cov}\left(\frac{2}{n_k} \sum_{i < j} X_{i,j}^k (n_k - X_{i,j}^k), \frac{1}{n_k} \sum_{i < j} (n_{k\oplus} X_{i,j}^k + n_k X_{i,j}^{k\oplus} - 2X_{i,j}^{k\oplus} X_{i,j}^k)\right),$$

applying the independence between both random variable can be expressed as,

$$\begin{aligned} \text{Cov}(D_{G^k}(\mathcal{M}_k), D_{G^{k\oplus}}(\mathcal{M}_k)) &= \frac{2}{n_k^2} \sum_{i < j} (\text{Cov}(X_{i,j}^k n_k, n_{k\oplus} X_{i,j}^k) - 2\text{Cov}(X_{i,j}^k n_k, X_{i,j}^{k\oplus} X_{i,j}^k) + \\ &\quad - \text{Cov}((X_{i,j}^k)^2, n_{k\oplus} X_{i,j}^k) + 2\text{Cov}((X_{i,j}^k)^2, X_{i,j}^{k\oplus} X_{i,j}^k)). \end{aligned}$$

And again each term can be easily expressed in terms of the moments of the binomial distribution.

$\text{Cov}(D_{G^k}(\mathcal{M}_k), D_G(\mathcal{M}_k))$

$$\begin{aligned} \text{Cov}(D_{G^k}(\mathcal{M}_k), D_G(\mathcal{M}_k)) &= \text{Cov}(D_{G^k}(\mathcal{M}_k), D_{G^k}(\mathcal{M}_k) + D_{G^{k\oplus}}(\mathcal{M}_k)) = \\ &= \text{Var}(D_{G^k}(\mathcal{M}_k)) + \text{Cov}(D_{G^k}(\mathcal{M}_k), D_{G^{k\oplus}}(\mathcal{M}_k)). \end{aligned}$$

The two terms have been previously calculated.

$$\underline{\text{Cov}(D_{G^r}(\mathcal{M}_r), D_{G^t}(\mathcal{M}_t)) \quad \text{with } r \neq t}$$

$$\text{Cov}(D_{G^r}(\mathcal{M}_r), D_{G^t}(\mathcal{M}_t)) = 0,$$

since  $D_{G^r}(\mathcal{M}_r)$  and  $D_{G^t}(\mathcal{M}_t)$  are independent random variables

$$\underline{\text{Cov}(D_{G^r}(\mathcal{M}_r), D_G(\mathcal{M}_t)) \quad \text{with } r \neq t}$$

$$\begin{aligned} \text{Cov}(D_{G^r}(\mathcal{M}_r), D_G(\mathcal{M}_t)) &= \text{Cov}(D_{G^r}(\mathcal{M}_r), D_{G^r}(\mathcal{M}_t) + D_{G^{r\oplus}}(\mathcal{M}_t)) = \\ &= \text{Cov}(D_{G^r}(\mathcal{M}_r), D_{G^r}(\mathcal{M}_t)) + \text{Cov}(D_{G^r}(\mathcal{M}_r), D_{G^{r\oplus}}(\mathcal{M}_t)) \end{aligned}$$

Now using that  $D_{G^r}(\mathcal{M}_t) = \frac{1}{n_t} \sum_{i < j} (n_r X_{i,j}^t + n_t X_{i,j}^r - 2X_{i,j}^r X_{i,j}^t)$  we obtain

$$\begin{aligned} \text{Cov}(D_{G^r}(\mathcal{M}_r), D_{G^r}(\mathcal{M}_t)) &= \frac{2}{n_r n_t} \sum_{i < j} \text{Cov}(n_r X_{i,j}^r, n_t X_{i,j}^r) - 2\text{Cov}(n_r X_{i,j}^r, X_{i,j}^r X_{i,j}^t) + \\ &\quad - \text{Cov}((X_{i,j}^r)^2, n_t X_{i,j}^r) + 2\text{Cov}((X_{i,j}^r)^2, X_{i,j}^r X_{i,j}^t) \end{aligned}$$

Since  $D_{G^r}(\mathcal{M}_r)$  and  $D_{G^{r\oplus}}(\mathcal{M}_t)$  are independent

$$\text{Cov}(D_{G^r}(\mathcal{M}_r), D_{G^{r\oplus}}(\mathcal{M}_t)) = 0$$

$$\underline{\text{Cov}(D_G(\mathcal{M}_r), D_G(\mathcal{M}_t))}$$

$$\begin{aligned} D_G(\mathcal{M}_r) &= \sum_{i < j} (n - X_{i,j}^r - X_{i,j}^t - X_{i,j}^{rt\oplus}) \frac{X_{i,j}^r}{n_r} + (X_{i,j}^r + X_{i,j}^t + X_{i,j}^{rt\oplus}) (1 - \frac{X_{i,j}^r}{n_r}) \text{ and } D_G(\mathcal{M}_t) = \sum_{i < j} (n - \\ X_{i,j}^r - X_{i,j}^t - X_{i,j}^{rt\oplus}) \frac{X_{i,j}^t}{n_t} + (X_{i,j}^r + X_{i,j}^t + X_{i,j}^{rt\oplus}) (1 - \frac{X_{i,j}^t}{n_t}) \end{aligned}$$

$$\begin{aligned} \text{Cov}(D_G(\mathcal{M}_r), D_G(\mathcal{M}_t)) &= \sum_{i < j} \text{Cov}((n - X_{i,j}^r - X_{i,j}^t - X_{i,j}^{rt\oplus}) \frac{X_{i,j}^r}{n_r}, (n - X_{i,j}^r - X_{i,j}^t - X_{i,j}^{rt\oplus}) \frac{X_{i,j}^t}{n_t}) + \\ &\quad + \text{Cov}((n - X_{i,j}^r - X_{i,j}^t - X_{i,j}^{rt\oplus}) \frac{X_{i,j}^r}{n_r}, (X_{i,j}^r + X_{i,j}^t + X_{i,j}^{rt\oplus}) (1 - \frac{X_{i,j}^t}{n_t})) + \\ &\quad + \text{Cov}((X_{i,j}^r + X_{i,j}^t + X_{i,j}^{rt\oplus}) (1 - \frac{X_{i,j}^r}{n_r}), (n - X_{i,j}^r - X_{i,j}^t - X_{i,j}^{rt\oplus}) \frac{X_{i,j}^t}{n_t}) + \\ &\quad + \text{Cov}((X_{i,j}^r + X_{i,j}^t + X_{i,j}^{rt\oplus}) (1 - \frac{X_{i,j}^r}{n_r}), (X_{i,j}^r + X_{i,j}^t + X_{i,j}^{rt\oplus}) (1 - \frac{X_{i,j}^t}{n_t})) \end{aligned}$$

From here is straightforward to finish the expression in terms of the moments of the binomial distribution.

$$\underline{\text{Cov}(D_G(\mathcal{M}_r), D_{G^t}(\mathcal{M}_t))}$$

$$\text{Cov}(D_G(\mathcal{M}_r), D_{G^t}(\mathcal{M}_t)) = \text{Cov}(D_{G^t}(\mathcal{M}_t), D_G(\mathcal{M}_r))$$

The right term was already calculated.

1.4 A1.4- Proof iii: Under  $H_A$ 

Let write the sample size of each subpopulation as  $n_k = c_k n$  where  $0 < c_k < 1$ , and  $\sum_{k=1}^m c_k = 1$ . The proof is based on the fact that if  $H_0$  is not true then for any  $d < 0$  there exist a  $n$  such that

$$\mathbb{E}(T) < d.$$

Or equivalently,

$$\lim_{n \rightarrow \infty} \mathbb{E}(T) = -\infty.$$

$$\mathbb{E}(T) = \sum_{k=1}^m \frac{\sqrt{m}}{a} \sum_{k=1}^m \sqrt{n_k} \left( \frac{1}{n_k - 1} \mathbb{E}(D_{G^k}(\mathcal{M}_k)) - \frac{1}{n - 1} \mathbb{E}(D_G(\mathcal{M}_k)) \right) \quad (5)$$

It easy to verify that

$$\mathbb{E}(T) = \frac{\sqrt{m}}{a} \sum_{i < j} \mathbb{E}(T^{i,j}) := \sum_{i < j} \frac{\sqrt{m}}{a} \sum_{k=1}^m \sqrt{n_k} \left( \frac{1}{n_k - 1} \mathbb{E}(D_{G^k}^{i,j}(\mathcal{M}_k)) - \frac{1}{n - 1} \mathbb{E}(D_G^{i,j}(\mathcal{M}_k)) \right), \quad (6)$$

where the sum  $\sum_{i < j}$  is over all links,  $D_{G^k}^{i,j}(\mathcal{M}_k) = \frac{2}{n_k} X_{i,j}^k (n_k - X_{i,j}^k)$  and  $D_G^{i,j}(\mathcal{M}_k) = \frac{2}{n_k} X_{i,j}^k (n_k - X_{i,j}^k) + \frac{1}{n_k} (n_{k \oplus} X_{i,j}^k + n_k (\sum_{h \neq k} X_{i,j}^h) - 2(\sum_{h \neq k} X_{i,j}^h) X_{i,j}^k)$

For simplicity reasons let suppose that the first  $m - 1$  groups have a mean network  $\tilde{\mathcal{M}}$  with elements  $\tilde{\mathcal{M}}(i, j) = p(i, j)$  and the last group  $m$  has another mean network  $\tilde{\mathcal{M}}_m$  with elements

$$\tilde{\mathcal{M}}_m(i, j) = \begin{cases} p(i, j) & \text{for all } (i, j) \neq (i^*, j^*) \\ q(i, j) & \text{for all } (i, j) = (i^*, j^*), \end{cases}$$

with  $q(i^*, j^*) \neq p(i^*, j^*)$ . i.e. the mean network differ in only one link. Under this hypothesis,

$$\mathbb{E}(T) = \mathbb{E}(T^{i^*, j^*}),$$

since the  $\mathbb{E}(T^{i,j}) = 0$  for all  $(i, j) \neq (i^*, j^*)$ . Now, if we replace  $D_{G^k}^{i,j}(\mathcal{M}_k)$  and  $D_G^{i,j}(\mathcal{M}_k)$  and we take expectation it is easy to verify that  $\mathbb{E}(T)$  is a quadric expression in  $p(i^*, j^*)$  and  $q(i^*, j^*)$ . If we call  $x = p(i^*, j^*)$  and  $y = q(i^*, j^*)$ , then  $\mathbb{E}(T)$  verifies

$$\mathbb{E}(T) = a_1 x^2 + a_2 y^2 + a_3 xy + a_4 x + a_5 y + a_6.$$

Now we now that if  $x = y$  (null hypothesis) then  $\mathbb{E}(T) = 0$ . This means that the there is 1 dimensional subspace that is solution of the equation  $\mathbb{E}(T) = 0$ . Now, there ara two possibilities for a quadric equation to verifies this last. If there exist another 1 dimensional space for the equation  $\mathbb{E}(T) = 0$  then the function  $\mathbb{E}(T)$  is an hyperbolic paraboloid, if not the function  $\mathbb{E}(T)$  is a parabolic cylinder. In order to distinguish between these two cases we will move a little ( $\epsilon \ll 1$ ) to both sides of the found solution for  $\mathbb{E}(T) = 0$  (the line  $x=y$ ) and see if the sign of  $\mathbb{E}(T)$  change. If the sign changes then  $\mathbb{E}(T)$  is an hyperbolic paraboloid, if not  $\mathbb{E}(T)$  is a parabolic cylinder.

We will study  $\mathbb{E}(T)$  for  $(x_1, y_1) = (1/2, 1/2 + \epsilon)$  and for  $(x_2, y_2) = (1/2, 1/2 - \epsilon)$  with  $\epsilon > 0$ . For simplicity we will study  $\lim_{n \rightarrow \infty} \frac{1}{\sqrt{n}} \mathbb{E}(T)$  which is enough for proof <sup>1</sup>.

It is straightforward to see that for both  $(x_1, y_1)$  and  $(x_2, y_2)$

$$\lim_{n \rightarrow \infty} \frac{1}{\sqrt{n}} \mathbb{E}(T) = -2(1 - c_m) \sqrt{c_m} \epsilon^2,$$

<sup>1</sup> Based on T it is easy to see that the rate of convergence  $\frac{1}{\sqrt{n}}$

which is negative value since  $0 < c_m < 1$ , confirming that  $\mathbb{E}(T)$  is a parabolic cylinder that goes than, i.e. if  $q(i^*, j^*) \neq p(i^*, j^*)$  then

$$\lim_{n \rightarrow \infty} \mathbb{E}(T) = -\infty.$$

To finish the proof we say that any other alternative hypothesis can be proved from this particular alternative scenario. For example, if there exist another  $(i^{**}, j^{**})$  with  $p(i^{**}, j^{**}) \neq q(i^{**}, j^{**})$  then

$$\mathbb{E}(T) = \mathbb{E}(T^{i^*, j^*}) + \mathbb{E}(T^{i^{**}, j^{**}})$$

and we apply the same proof for each term. Another alternative hypothesis might be that there exist a unique  $(i^*, j^*)$  where  $p_r(i^*, j^*) \neq p_s(i^*, j^*)$  for  $r \neq s$  being  $p_r(i^*, j^*)$  the probability of observing link  $(i^*, j^*)$  in subpopulation  $r$ . In this case  $\mathbb{E}(T)$  is a quadric expression in  $p_1(i^*, j^*)$ ,  $p_2(i^*, j^*)$ , ..., and  $p_m(i^*, j^*)$ . And the same argument can be used obtaining the same result, under the alternative hypothesis  $\lim_{n \rightarrow \infty} \mathbb{E}(T) = -\infty$ .



## 2 A2- EXAMPLE 1

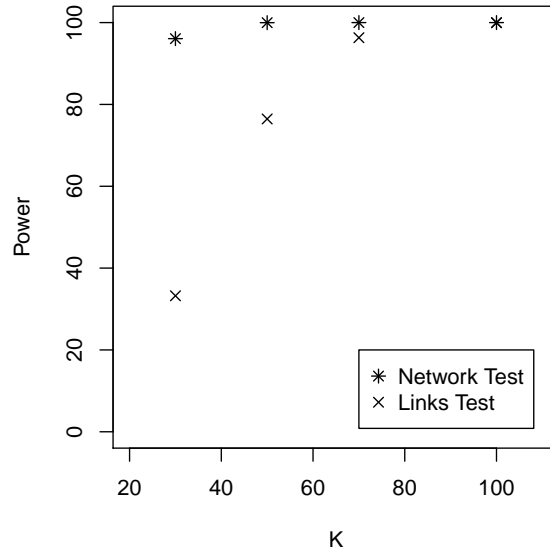

Figure S1: Fig A1: Power of the tests as a function of the sample size for the model with parameters  $\lambda_1 = 0.5$ ,  $\lambda_2 = 2/3$ , and  $\lambda_3 = 0.5$ .

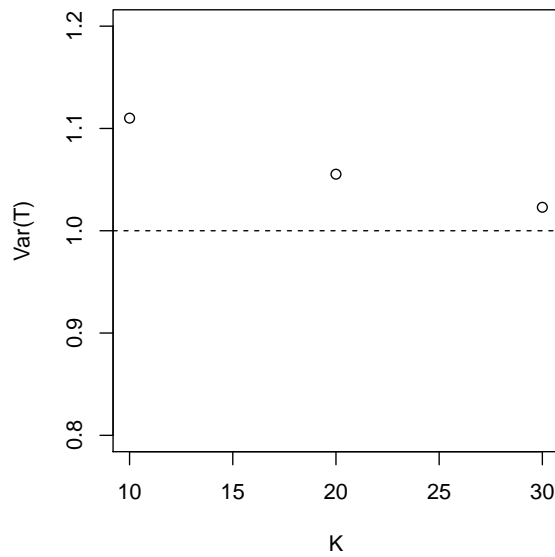

Figure S2: Fig A2: **Null hypothesis.** Variance of T statistics as a function of the sample size,  $K$  for the model with parameters  $\lambda_1 = 0.5$ ,  $\lambda_2 = 0.8$ , and  $\lambda_3 = 0.6$ .

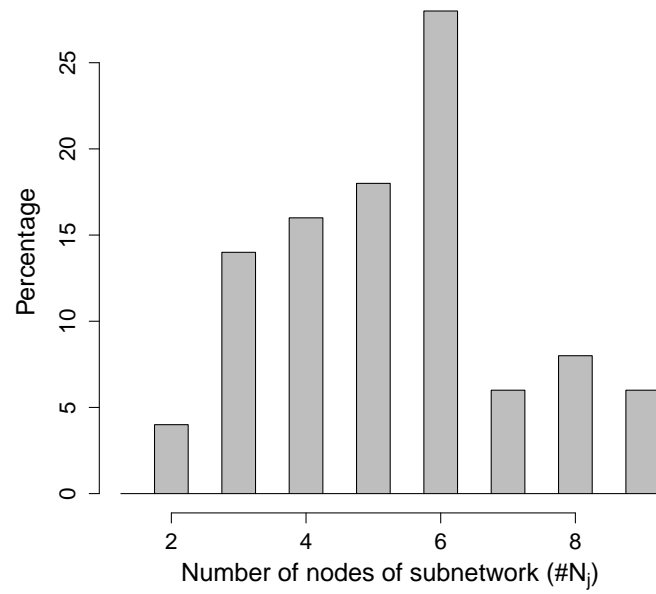

**Figure S3:** Fig A3: Histogram of number of nodes determine by identification procedure. These results correspond to the model with parameters  $\lambda_1 = 0.5$ ,  $\lambda_2 = 0.8$ ,  $\lambda_3 = 0.6$  and  $K = 30$ .

### 3 A3- HCP RESTING-STATE FMRI FUNCTIONAL NETWORKS

For each variable, we calculated  $W_3$  as well as  $W_4$  and  $W_5$ , which counts the number of T statistics lower than -4 and -5, respectively. Using a resampled bootstrap, we obtained empirical probabilities  $P(W_5 \geq 1) = 0$  (less than 1/10000) and  $P(W_4 = 1) = 1/10000$ . Variables with  $W_3$  values greater than 3 are shown in Table S1 and S2.

| Brain volumetric variable      | $W_3$ | $W_4$ | $W_5$ |
|--------------------------------|-------|-------|-------|
| FS-R-Inferiortemporal-Area     | 5     | 5     | 3     |
| FS-SupraTentorial-Vol          | 5     | 5     | 3     |
| FS-R-WM-Vol                    | 5     | 4     | 3     |
| FS-R-Cort-GM-Vol               | 6     | 3     | 3     |
| FS-BrainSeg-Vol                | 5     | 3     | 3     |
| FS-Tot-WM-Vol                  | 5     | 3     | 3     |
| FS-Mask-Vol                    | 5     | 3     | 3     |
| FS-L-Middletemporal-Area       | 9     | 4     | 2     |
| FS-R-Cuneus-Area               | 5     | 4     | 2     |
| FS-L-Lateraloccipital-Area     | 4     | 4     | 2     |
| FS-R-Superiorfrontal-Area      | 5     | 3     | 2     |
| FS-BrainSeg-Vol-No-Vent        | 5     | 3     | 2     |
| FS-L-Supramarginal-Area        | 5     | 3     | 1     |
| FS-R-Fusiform-Area             | 5     | 2     | 2     |
| FS-BrainStem-Vol               | 5     | 2     | 1     |
| FS-R-Precentral-Area           | 5     | 2     | 1     |
| FS-L-Superiorfrontal-Area      | 4     | 3     | 2     |
| FS-L-WM-Vol                    | 4     | 3     | 2     |
| FS-OpticChiasm-Vol             | 4     | 2     | 2     |
| FS-R-Rostralmiddlefrontal-Area | 4     | 2     | 1     |

**Table S1:** Variables that partitioned the subjects in groups that present very high statistical differences between the corresponding brain networks. Only variables with  $W_3 \geq 4$  are included.

| Behavioral variables (label)                | $W_3$ | $W_4$ | $W_5$ |
|---------------------------------------------|-------|-------|-------|
| Amount of sleep (PSQI_AmtSleep)             | 9/8/7 | 6/6/7 | 4/6/6 |
| Cognitive flexibility (CardSort_AgeAdj)     | 4/3/4 | 3/3/4 | 0/3/3 |
| Cognitive flexibility (CardSort_Unadj)      | 4/3/3 | 0/2/2 | 0/2/2 |
| Motor (Strength_AgeAdj)                     | 4/3/3 | 4/3/3 | 3/2/2 |
| Motor (Strength_Unadj)                      | 4/3/4 | 4/2/3 | 2/2/2 |
| Working memory (WM_Task_2bk_Acc)            | 3/5/1 | 0/2/1 | 0/0/1 |
| Relational processing (Relational_Task_Acc) | 3/4/7 | 0/3/6 | 0/0/5 |
| Delay discounting (DDisc_SV_10yr_40K)       | 1/5/7 | 0/1/6 | 0/0/6 |
| Delay discounting (DDisc_AUC_40K)           | 0/4/4 | 0/3/4 | 0/3/4 |

**Table S2:** Behavioral variables that partitioned the subjects in groups that present high statistical differences between the corresponding brain networks. The  $W_3$ ,  $W_4$  and  $W_5$  statistics are presented for different networks sizes (15 / 50 / 300). Only variables with  $W_3 \geq 4$  are included.

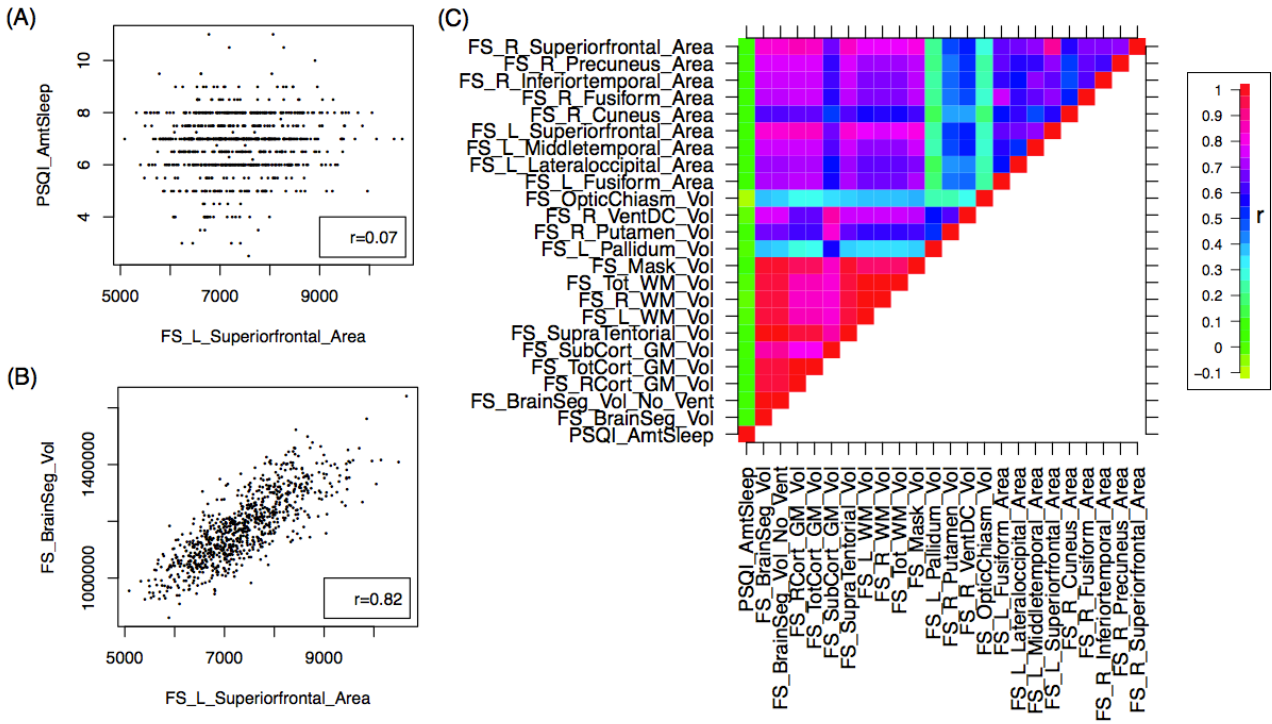

Figure S4: Fig A4: Relationship between variable Right Inferiortemporal Area and variable: (A) Amount of sleep , (B) Brain segmentation volume. The Spearman correlation coefficient between both variables are shown. (C) Spearman correlation matrix between the highly significant variables.

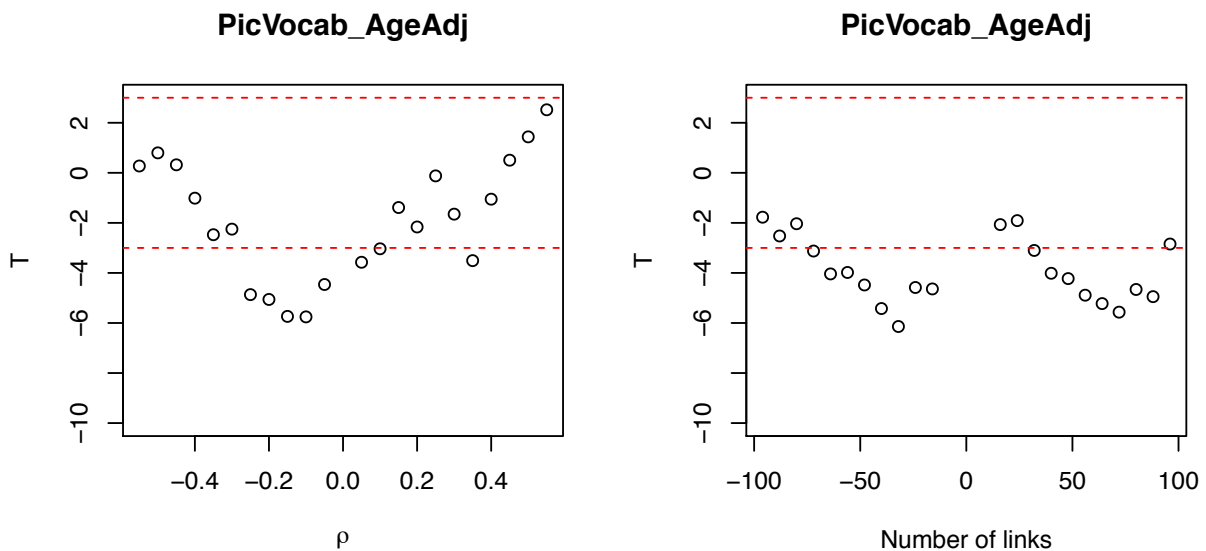

Figure S5: Fig A5: T-statistics as a function of (left panel)  $\rho$  and (right panel) the number of links for the variable *Picture vocabulary test*.
